# Supplementary material for: The structure of aqueous solutions of hexafluoro-iso-propanol studied by neutron diffraction with hydrogen/deuterium isotope substitution and empirical potential structure refinement modeling
Source: Royal Society of Chemistry journal article supplement (doi:10.1039/d1cp00950h), 2021-01-01
Supplement: d1cp00950h1.pdf [file d1cp00950h1.pdf]

## Supporting Information

### **The structure of aqueous solutions of hexafluoro-iso-propanol studied by neutron diffraction with hydrogen/deuterium isotope substitution and empirical potential structure refinement modeling**

K. YOSHIDA<sup>a</sup>, T. YAMAGUCHI<sup>a\*</sup>, D. T. BOWRON<sup>b</sup>, J. L. FINNEY<sup>c</sup>

<sup>a</sup> Department of Chemistry, Faculty of Science, Fukuoka University, Nanakuma, Jonan, Fukuoka 814-0180, Japan.

<sup>b</sup>ISIS Facility, Rutherford Appleton Laboratory, Didcot, OX11 0QX, UK

<sup>c</sup>Department of Physics and Astronomy, University College London, Gower Street, London WC1E 6BT, UK

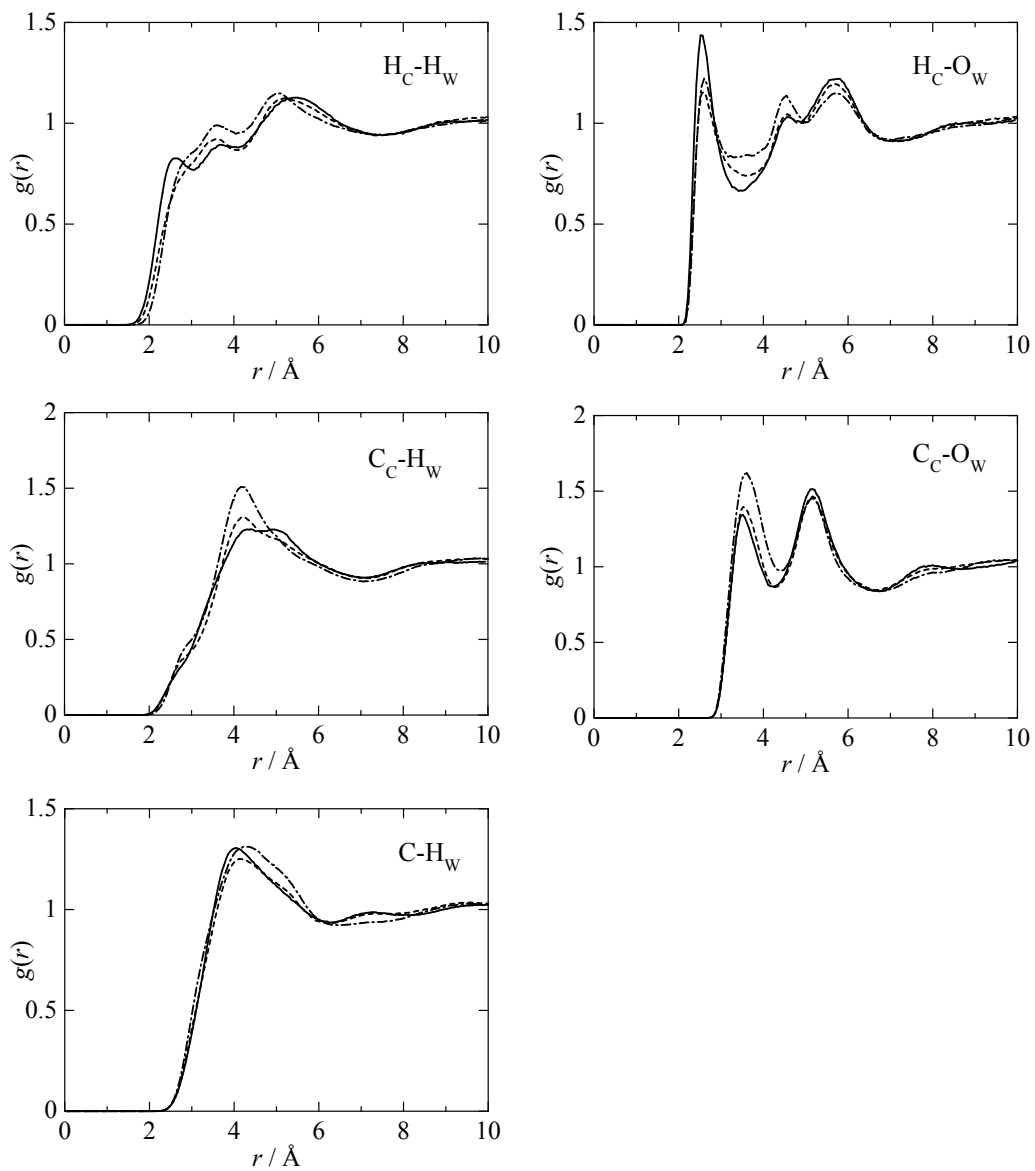

Figure S1. The pair correlation functions of the non-polar interaction between HFIP and water molecules for the HFIP-water mixtures at  $x_{\text{HFIP}}=0.1$  (solid lines), 0.2 (dashed lines), and 0.4 (dot and dashed lines).

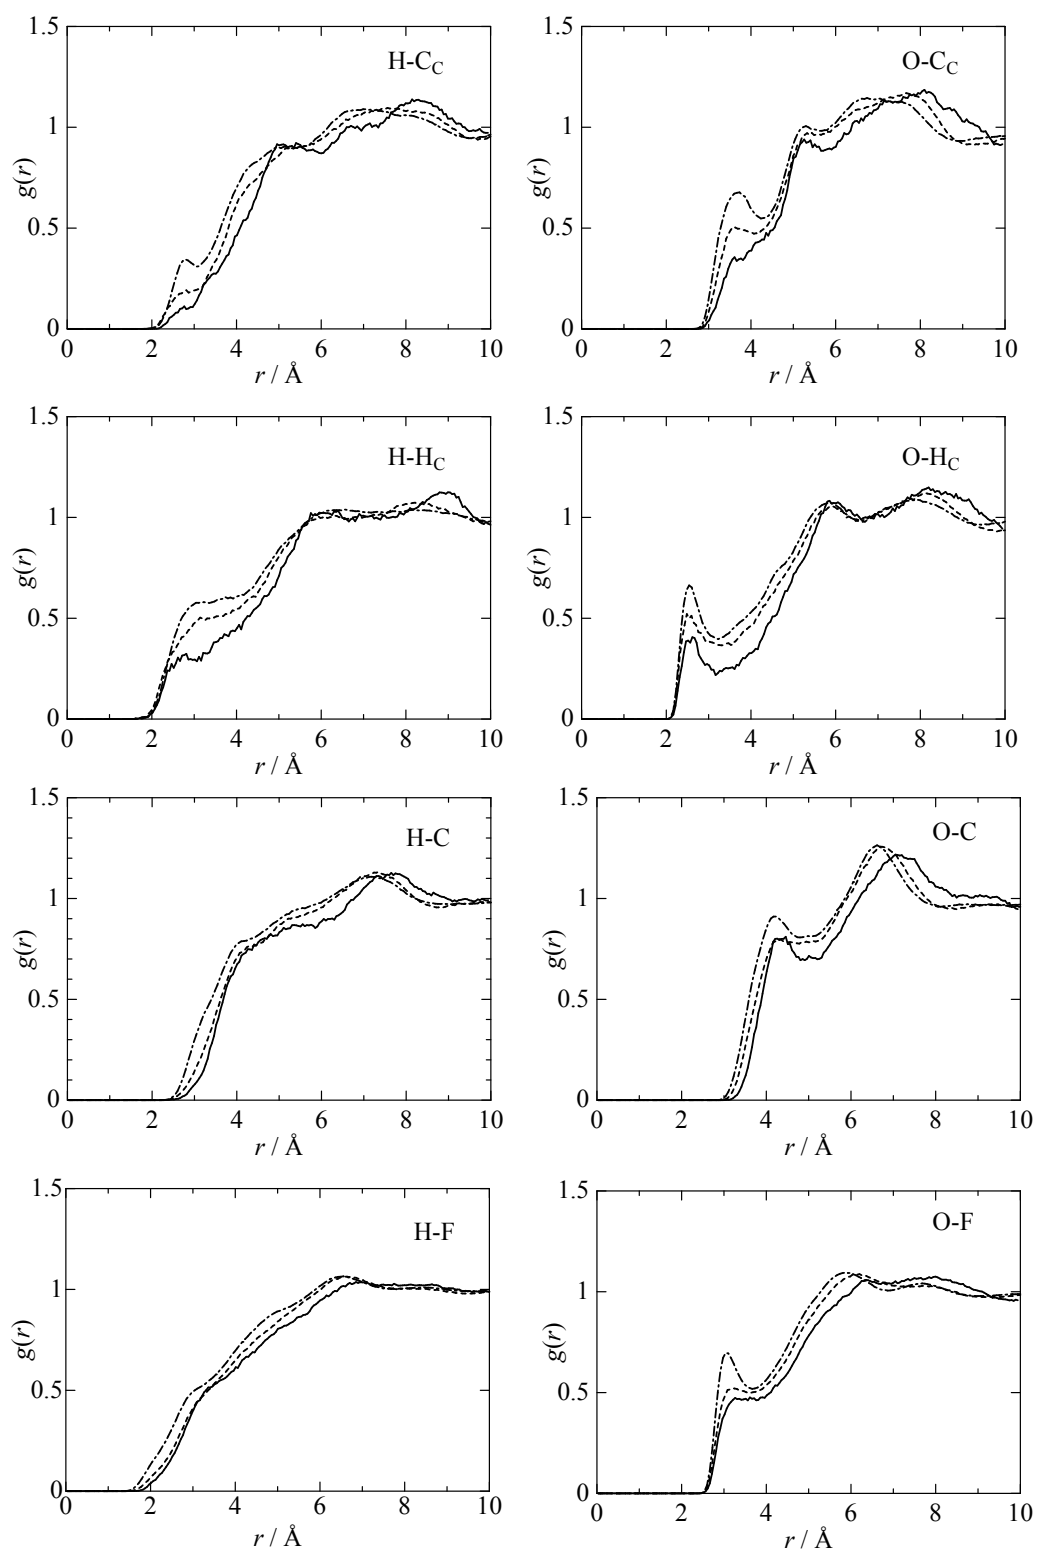

Figure S2. The pair correlation functions of HFIP-HFIP interaction for the HFIP-water mixtures at  $x_{\text{HFIP}}=0.1$  (solid lines), 0.2 (dashed lines), and 0.4 (dot and dashed lines).

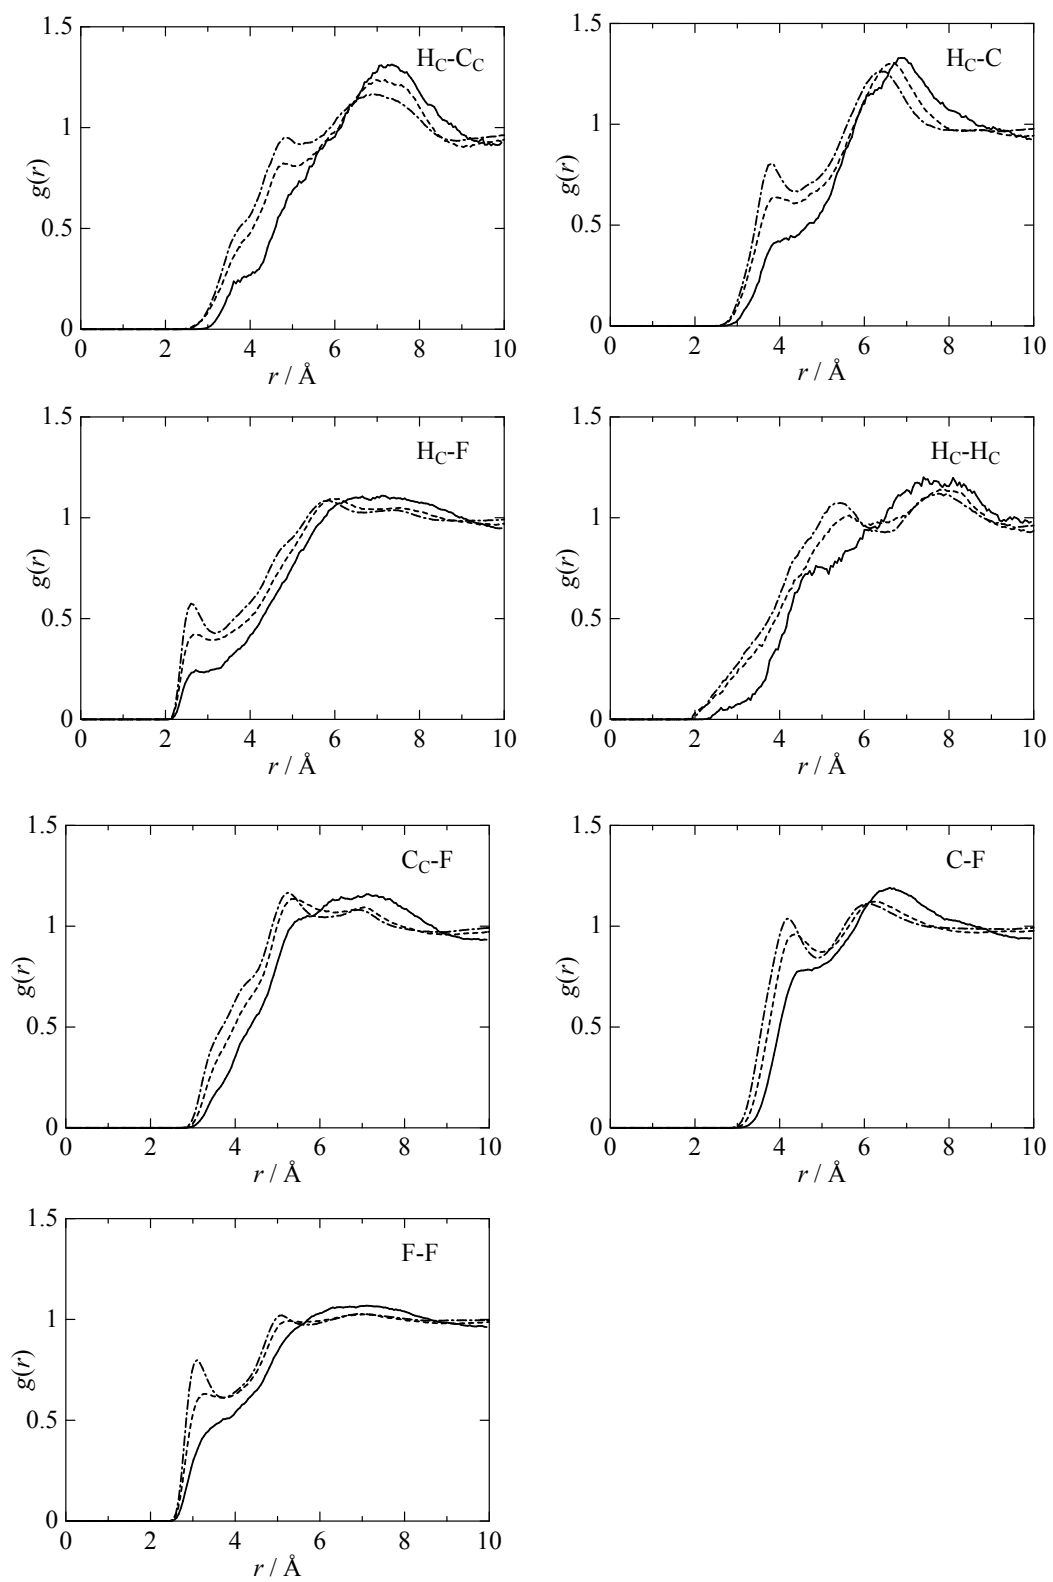

Figure S2. (Continued)

Table S1. The coordination number of the second neighbor coordination shell obtained from integration of pcf's between the lower and upper limits  $r_{\min}$  and  $r_{\max}$ , respectively, HFIP-HFIP interactions at  $x_{\text{HFIP}} = 0.1, 0.2,$  and  $0.4$ .

|                                | $r_{\min}$ | $r_{\max}$ | $x_{\text{HFIP}}$ |             |             |
|--------------------------------|------------|------------|-------------------|-------------|-------------|
|                                |            |            | 0.1               | 0.2         | 0.4         |
| O <sub>W</sub> -O <sub>W</sub> | 3.3        | 6.0        | 15.0 ± 3.2        | 10.6 ± 3.1  | 5.4 ± 2.8   |
| O <sub>W</sub> -H <sub>W</sub> | 2.5        | 4.5        | 14.5 ± 3.6        | 11.1 ± 3.6  | 6.5 ± 3.3   |
| O <sub>W</sub> -H              | 2.5        | 4.5        | 0.65 ± 0.75       | 1.0 ± 0.9   | 1.6 ± 1.1   |
| O-H <sub>W</sub>               | 2.5        | 4.0        | 7.3 ± 2.0         | 5.5 ± 2.4   | 3.4 ± 1.9   |
| O-O                            | 3.3        | 7.0        | 2.4 ± 1.3         | 3.6 ± 1.3   | 5.3 ± 1.5   |
| O-H                            | 2.5        | 4.0        | 0.19 ± 0.40       | 0.34 ± 0.50 | 0.57 ± 0.70 |
| C-O <sub>W</sub>               | 5.3        | 7.5        | 23.5 ± 3.0        | 15.3 ± 4.0  | 7.4 ± 2.9   |
| C <sub>c</sub> -O <sub>W</sub> | 4.2        | 6.0        | 15.0 ± 2.2        | 9.8 ± 3.9   | 4.8 ± 2.5   |
| C <sub>C</sub> -H <sub>W</sub> | 3.3        | 6.0        | 35.2 ± 4.4        | 23.3 ± 7.0  | 12.3 ± 5.6  |
| C <sub>C</sub> -O              | 4.3        | 5.0        | 1.2 ± 0.9         | 1.8 ± 1.1   | 2.9 ± 1.5   |
| C <sub>C</sub> -H              | 3.3        | 6.0        | 1.2 ± 0.9         | 1.8 ± 1.1   | 2.9 ± 1.5   |
| C-C                            | 5.8        | 8.5        | 8.6 ± 2.1         | 12.3 ± 2.5  | 16.4 ± 2.8  |
| F-C                            | 4.8        | 8.0        | 7.7 ± 1.9         | 11.8 ± 2.5  | 15.7 ± 2.6  |
| F-F                            | 3.8        | 5.6        | 5.2 ± 2.3         | 9.0 ± 3.1   | 12.4 ± 3.2  |
